# Supplementary material for: Automated Multi-Peak Tracking Kymography (AMTraK): A Tool to Quantify Sub-Cellular Dynamics with Sub-Pixel Accuracy
Source: PubMed Central journal article supplement (PMC5167257; doi:10.1371/journal.pone.0167620), 2016-12-19

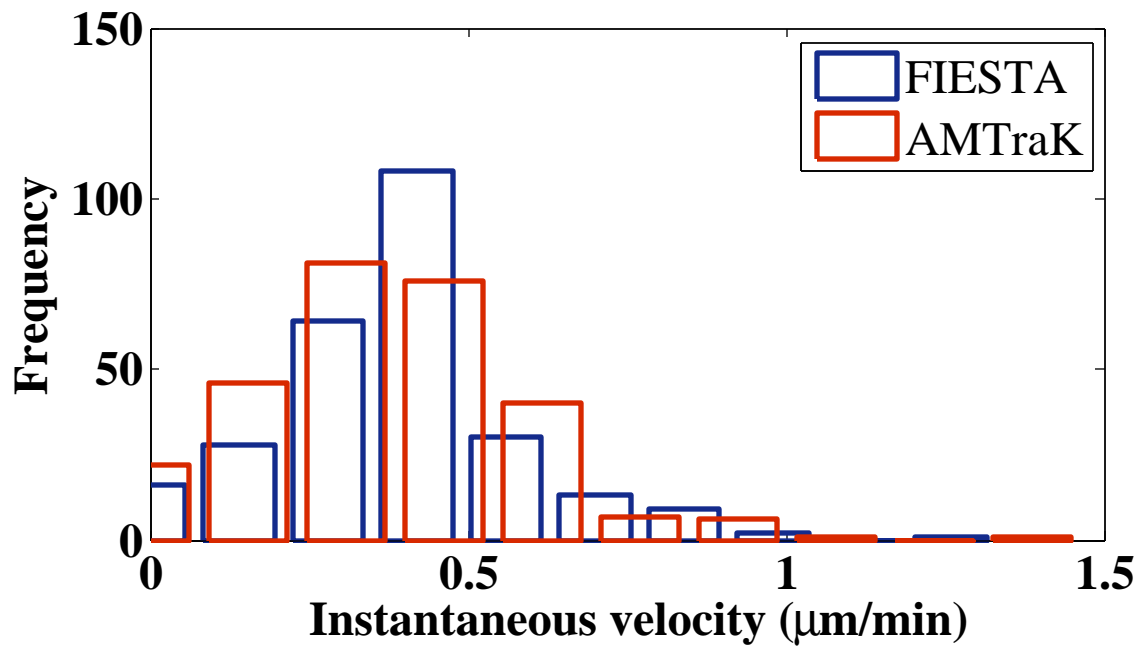

Supplement: pone.0167620.s008.pdf [file pone.0167620.s008.pdf]
